# Supplementary material
Source: PubMed Central journal article supplement (PMC6023731)
Supplement: NIHMS971000-supplement-1.pdf [file NIHMS971000-supplement-1.pdf]

## **Supplemental Information**

Contents:

Figure S1, related to Figure 1.

Figure S2, related to Figure 2.

Figure S3, related to Figure 3.

Figure S4, related to Figure 4.

Figure S5, related to Figure 4,5.

Figure S6, related to Figure 5,6.

Figure S7, related to Figure 7.

Table S1, related to Figure 1.

Table S2, related to Figure 4.

Table S3, related to Figure 4.

Table S4, related to Figure 4.

Table S5, related to Figure 4.

Figure S1, related to Figure 1

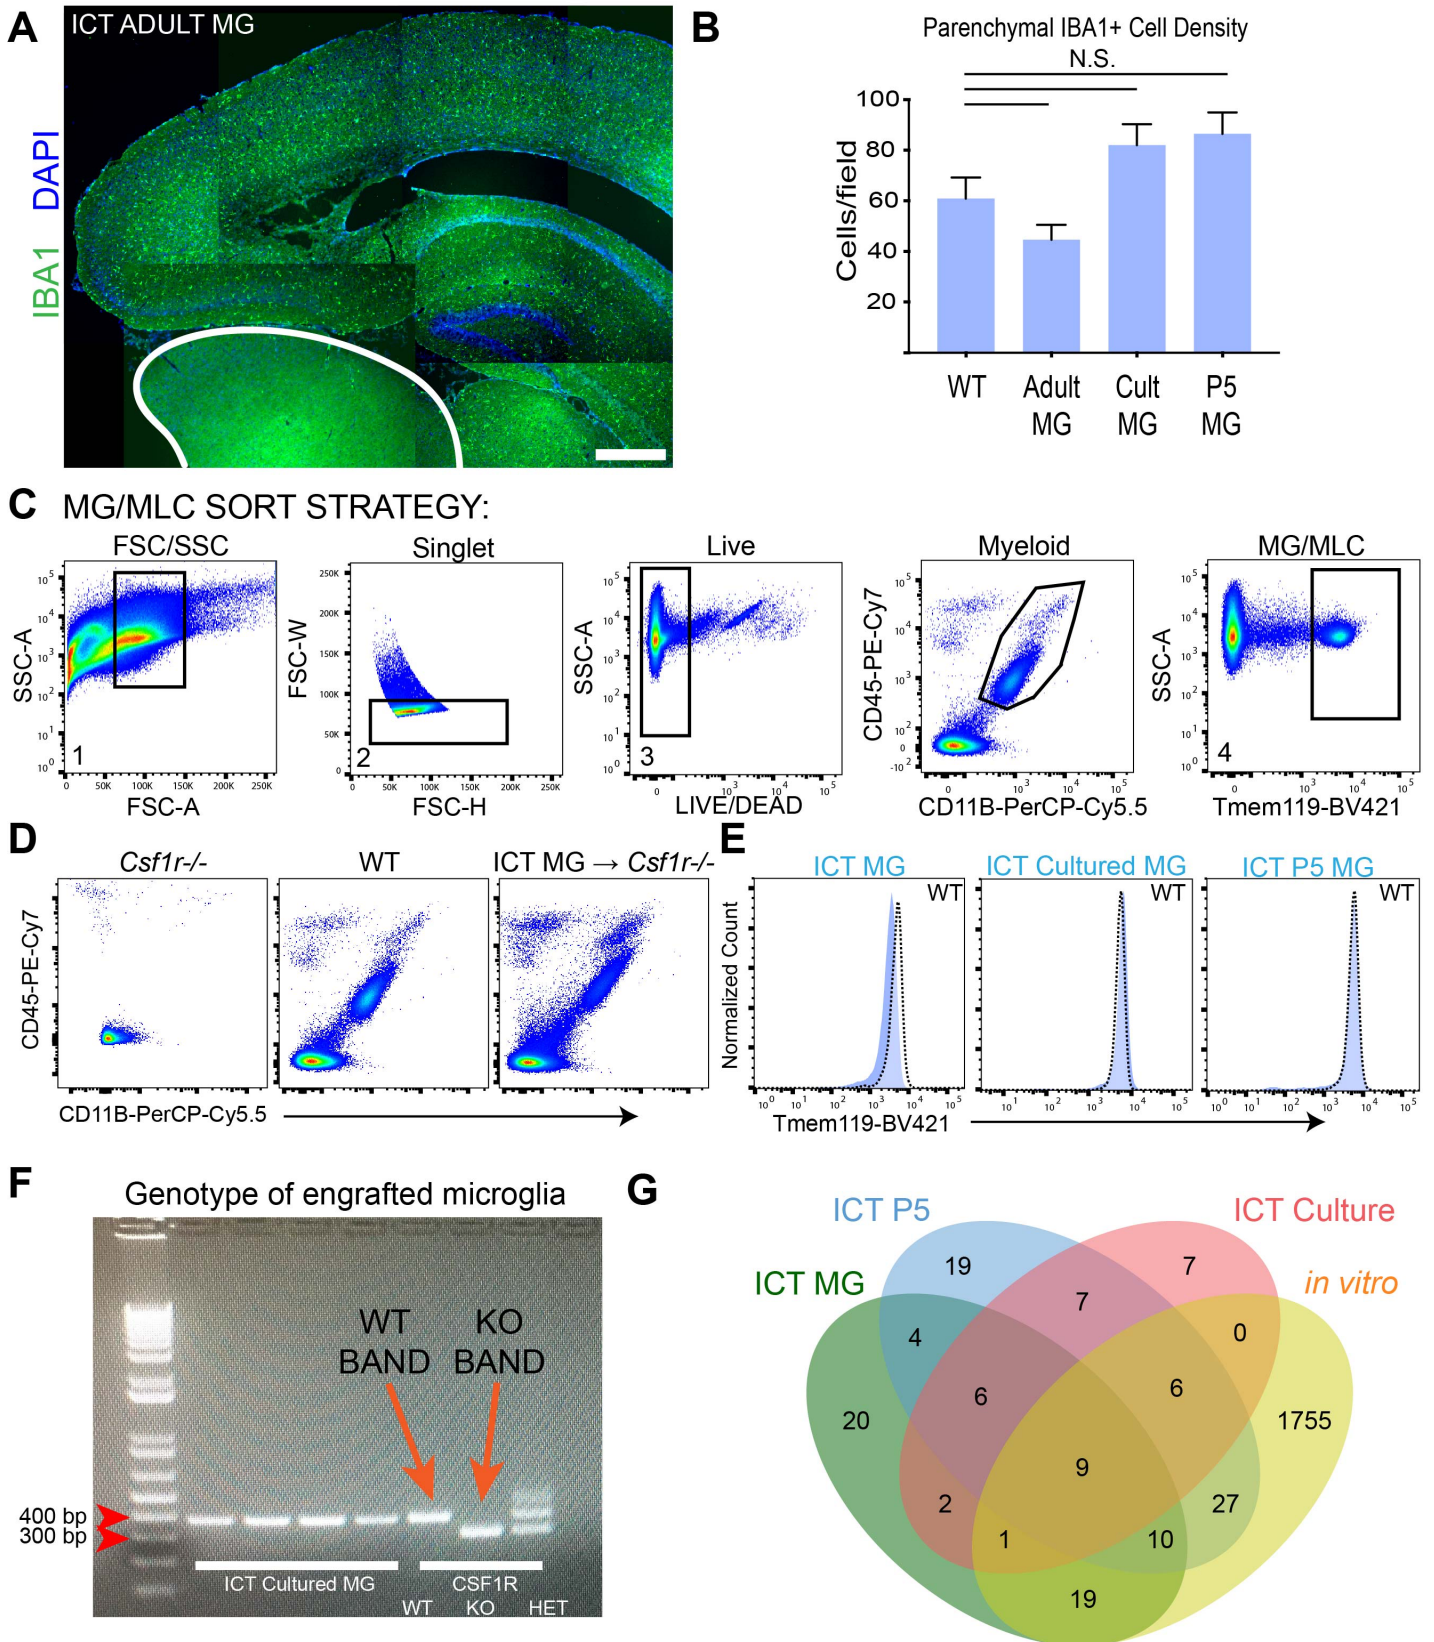

**Figure S1, related to Figure 1. Transplantation, sorting and recovery of donor derived WT microglia.** A) IBA1 immunostained section of *Csf1r*<sup>-/-</sup> brain transplanted with adult microglia showing typical widespread engraftment with some unpopulated territories, encircled by white line. Scale bar = 500µm. B) In areas of cell engraftment, transplanted microglia in *Csf1r*<sup>-/-</sup> hosts reach same density as microglia in a WT brain,  $p > 0.05$  adjusted for multiple comparisons to WT by Student's t-test, N.S. = not significant. C) Sort strategy for MLC isolation showing FSC/SSC, single cell, live, CD45/11B, and TMEM119 gates. MLCs were sorted based on TMEM119 immunoreactivity. Numbers in lower left of plots shows gate hierarchy (1>2>3>4). Cells were sorted from gate 4. D) Transplantation into *Csf1r*<sup>-/-</sup> hosts, which lack microglia (left), leads to engraftment of CD45<sup>+</sup>CD11B<sup>+</sup> cells (right) with similar profile to untransplanted microglia in a *Csf1r*<sup>+/+</sup> (WT) control (middle) E) Transplanted microglia (blue distribution) express Tmem119 at normal levels (black dotted) by flow cytometric analysis. F) Genotyping gel demonstrating that transplanted, then sorted microglia ("ICT Cultured MG") are WT for the *Csf1r* gene. G) Venn diagram showing differentially expressed genes between transplanted and WT microglia (2-fold cutoff, FPKM >20, FDR<0.05). ICT= intracerebral transplantation, MG=microglia, MLC = microglia-like cell, WT= *Csf1r*<sup>+/+</sup>, Cult = Cultured, P5 = postnatal day 5.

Figure S2, related to figure 2

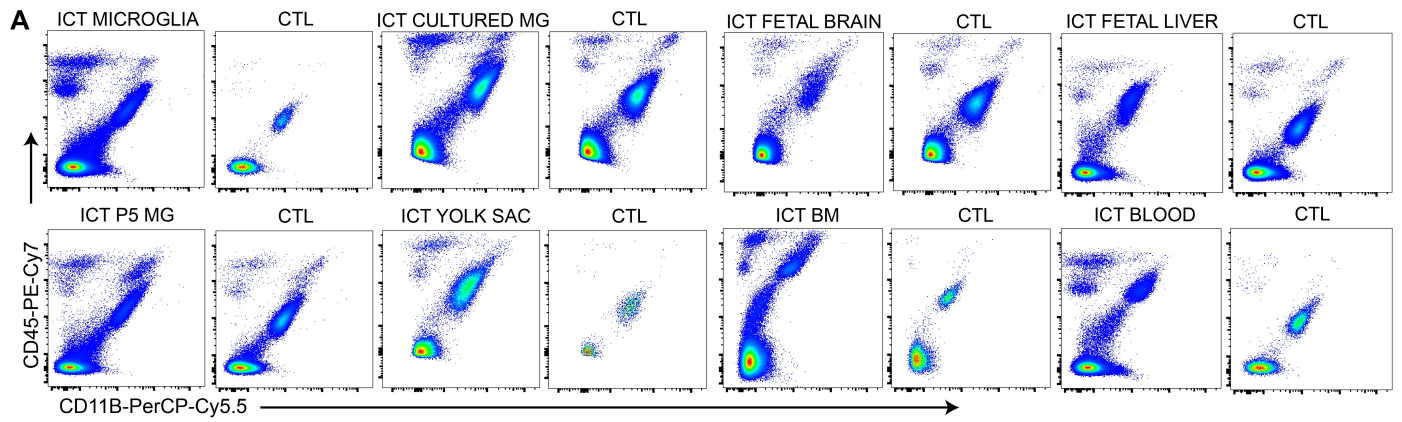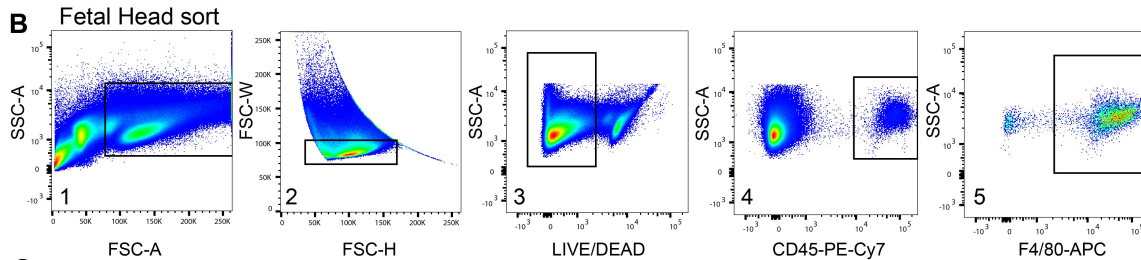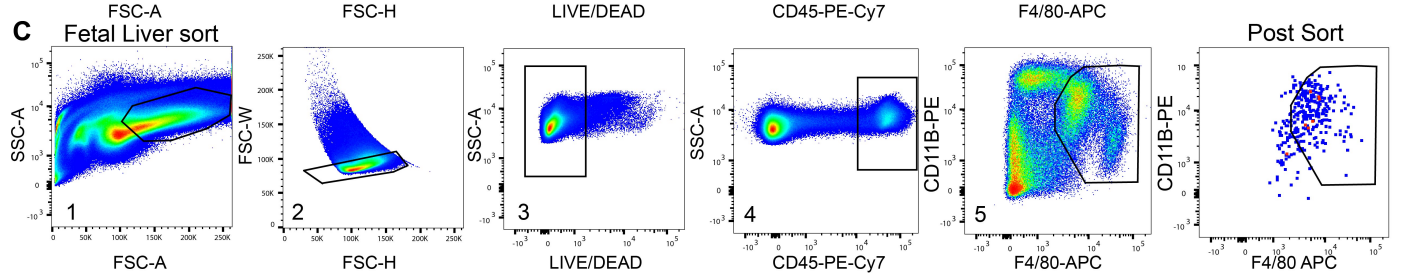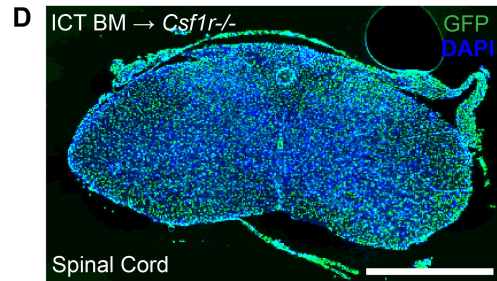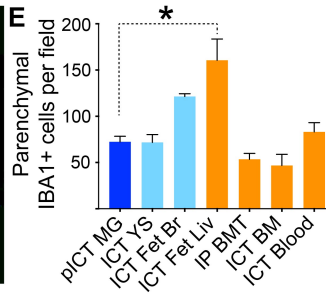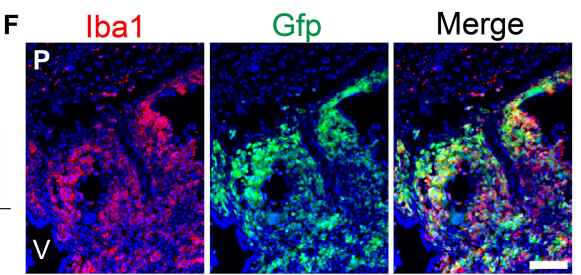

**G**

| ICT Type    | Sample | Recovery (vs WT) | % Tmem119+ of Yield | Parenchymal Iba1+ | RIN > 7 |
|-------------|--------|------------------|---------------------|-------------------|---------|
| Microglia   | 1      | 4.8              | 100                 | -                 | -       |
|             | 2      | 12.2             | 100                 | -                 | -       |
|             | 3      | 24.8             | 100                 | -                 | -       |
|             | 4      | 3.6              | 100                 | -                 | -       |
|             | 5      | 0.0              | -                   | -                 | -       |
| Cultured MG | 1      | 15.6             | 100                 | -                 | -       |
|             | 2      | 16.3             | 100                 | -                 | -       |
|             | 3      | 28.2             | 100                 | -                 | -       |
|             | 4      | 3.8              | 100                 | -                 | -       |
|             | 5      | 10.0             | 100                 | -                 | -       |
|             | 6      | 8.3              | 100                 | -                 | -       |
|             | 7      | 3.6              | 100                 | -                 | -       |
|             | 8      | 2.8              | 100                 | -                 | -       |
|             | 9      | 27.6             | 100                 | -                 | -       |
|             | 10     | 10.4             | 100                 | -                 | -       |
|             | 11     | 94.4             | 100                 | -                 | -       |
| P5 MG       | 1      | 20.7             | 100                 | -                 | -       |
|             | 2      | 39.1             | 100                 | -                 | -       |
|             | 3      | 33.3             | 100                 | -                 | -       |
|             | 4      | 51.9             | 100                 | -                 | -       |
|             | 5      | 23.0             | 100                 | -                 | -       |
|             | 6      | -                | 100                 | -                 | -       |
|             | 7      | -                | 100                 | -                 | -       |

| ICT Type    | Sample | Recovery (vs WT) | % Tmem119+ of Yield | Parenchymal Iba1+ | RIN > 7 |
|-------------|--------|------------------|---------------------|-------------------|---------|
| Yolk Sac    | 1      | 4.8              | 100                 | -                 | -       |
|             | 2      | 12.2             | 100                 | -                 | -       |
|             | 3      | 32.5             | 100                 | -                 | -       |
|             | 4      | 44.3             | 100                 | -                 | -       |
|             | 5      | 18.7             | 100                 | -                 | -       |
|             | 6      | -                | 100                 | -                 | -       |
| Fetal Brain | 1      | 10.4             | 100                 | -                 | -       |
|             | 2      | 9.3              | 100                 | -                 | -       |
|             | 3      | 11.0             | 100                 | -                 | -       |
|             | 4      | NA               | -                   | -                 | -       |
|             | 5      | NA               | -                   | -                 | -       |
| Fetal Liver | 1      | 31.4             | 100                 | -                 | -       |
|             | 2      | 35.6             | 100                 | -                 | -       |
|             | 3      | 11.7             | 100                 | -                 | -       |
|             | 4      | 35.1             | 100                 | -                 | -       |
|             | 5      | 29.5             | 100                 | -                 | -       |
|             | 6      | 2.9              | 100                 | -                 | -       |
|             | 7      | 1.3              | 100                 | -                 | -       |
|             | 8      | 74.1             | 100                 | -                 | -       |
|             | 9      | 69.1             | 100                 | -                 | -       |
|             | 10     | -                | 100                 | -                 | -       |
|             | 11     | -                | 100                 | -                 | -       |

| ICT Type | Sample | Recovery (vs WT) | % Tmem119+ of Yield | Parenchymal Iba1+ | RIN > 7 |
|----------|--------|------------------|---------------------|-------------------|---------|
| BM       | 1      | 11.3             | 100                 | -                 | -       |
|          | 2      | 9.1              | 100                 | -                 | -       |
|          | 3      | 11.0             | 100                 | -                 | -       |
|          | 4      | 8.2              | 100                 | -                 | -       |
|          | 5      | 10.1             | 100                 | -                 | -       |
|          | 6      | -                | 100                 | -                 | -       |
|          | 7      | -                | 100                 | -                 | -       |
|          | 8      | -                | 100                 | -                 | -       |
|          | 9      | -                | 100                 | -                 | -       |
|          | 14     | -                | 100                 | -                 | -       |
| Blood    | 1      | 1.9              | 100                 | -                 | -       |
|          | 2      | 13.8             | 100                 | -                 | -       |
|          | 3      | 15.2             | 100                 | -                 | -       |
|          | 4      | 12.2             | 100                 | -                 | -       |
|          | 5      | 4.4              | 100                 | -                 | -       |
|          | 6      | 2.7              | 100                 | -                 | -       |
|          | 7      | 3.6              | 100                 | -                 | -       |
|          | 8      | 8.3              | 100                 | -                 | -       |
|          | 9      | 2.8              | 100                 | -                 | -       |
|          | 10     | -                | 100                 | -                 | -       |
|          | 11     | -                | 100                 | -                 | -       |
|          | 12     | -                | 100                 | -                 | -       |
|          | 13     | -                | 100                 | -                 | -       |
|          | 14     | -                | 100                 | -                 | -       |

**Figure S2, related to Figure 2. MLC transplantation system.** A) Example FACS plots showing CD45/11B staining profile of MLCs across all donor types, with WT littermate control (CTL) to the right for comparison. B) Sort strategy for fetal head donor cell isolation showing FSC/SSC, single cell, live, CD45, and F4/80 gates. C) Sort strategy for fetal liver donor cell isolation showing FSC/SSC, single cell, live, CD45, and CD11B/F4/80 gates, and post-sort purity (large dots shown due to small number of cells collected for purity check). For B-C, numbers in lower left corner of plots shows gate hierarchy (1>2>3>4>5). Cells were sorted from gate 5. D) Lumbar spinal cord section from *Csf1r*<sup>-/-</sup> mouse transplanted by ICT at P3 with GFP-expressing WT bone marrow and harvested 14 days later. Scale bar = 500µm. E) MG and MLC density by Iba1 immunostaining across cortical and subcortical regions of engraftment normalized to area,  $p < 0.0001$  for effect of donor type on density by ANOVA,  $*p = 0.0001$  for pairwise difference between fetal liver and microglia, adjusted for multiple comparisons,  $p > 0.05$  for all other comparisons between MLCs and ICT MG control. F) Pertaining to Figure 2B: IBA1 staining (red) of ventricular donor cells from GFP+ BM, showing that nearly all cells attach to the choroid plexus and are IBA1+. Scale bar = 100µm. G) Table showing relative engraftment levels for ICT experiments (expressed as % recovery of TMEM119+ cells in ICT compared to WT littermate), and percent of parenchymal IBA1+ cells that were also TMEM119+ for histological sections of same samples. Asterisks indicate samples with adequate RNA yield and RNA Integrity Number (RIN) ( $> 7$ ) for RNAseq. YS = yolk sac, Fet Br = fetal brain, Fet Liv = fetal liver, IP = intraperitoneal, BMT = bone marrow transplant, BM = bone marrow, P = brain parenchyma, V = ventricular space.



**Figure S3, related to Figure 3. Peripheral bone marrow transplantation leads to CCR2-independent engraftment of donor-derived cells in multiple tissues, and results in partial rescue of the *Csf1r*<sup>-/-</sup> phenotype.** A) *Csf1r* genotyping gel for whole brain and TMEM119 sorted microglia and MLCs. Green arrows indicate appearance of WT band in *Csf1r*<sup>-/-</sup> (KO) whole brain samples following WT donor cell engraftment. WT band has expected migration at 385 BP, KO band at 300 BP. B) Liver section from *Csf1r*<sup>-/-</sup> mouse following IP transplantation of GFP-labeled BM, scale bar = 50µm. C) Bar graph showing intensity of IgG and albumin (Alb) staining for *Csf1r*<sup>-/-</sup> (KO, n=2) compared to littermate control (CTL, n=3) animals at age P21, expressed as mean fluorescence intensity ratio between stain and control (no antibody for IgG, secondary only for albumin). D) Representative image of ramified IBA1<sup>+</sup> (green) CCR2<sup>-/-</sup> (red) cells showing relatively low (arrowheads) and high RFP expressing cells engrafted in the *Csf1r*<sup>-/-</sup> parenchyma. Scale bar = 25µm. E) Representative image of ramified IBA1<sup>+</sup> (green) cells stained for RFP (red), demonstrating typical abundance of RFP<sup>+</sup> cells in a periventricular distribution. V = ventricle. Scale bar = 100µm. F) Pertaining to Figure 3F: purification strategy for BM monocyte transplantation, showing FSC/SSC, single cell gates, followed by c-kit/CD45 and Ly6c/lineage plots before bead enrichment, before FACS, and post-sort. The lineage cocktail included antibodies against CD3, B220, NK1.1, Il7Ra, SiglecF, and GR1. Numbers in lower left corner of plots show gate hierarchy (1>2>3>4). Cells were sorted from gate 4.





**Figure S4, related to Figure 4. Transcriptomic profiling of highly pure myeloid cells reveals similarities and differences between microglia and MLCs in the CNS environment.** A) Sorted cell purity heatmap showing expression of brain cell-type specific markers. B) Principal component analysis (PCA) coded by library prep batch (colors) and sequencing run lane (symbols). Ellipses demarcate 95% confidence intervals for samples grouped by batch. C) Correlation heatmap depicting Spearman coefficients between microglia, MLCs from all sources, and myeloid cell types from published datasets. Table identifies source of datasets. D) Scatterplot showing 2 largest principle components for diverse myeloid cells from current and other studies (PCA performed on 2500 most variant genes). Table identifies source of datasets. ICT = Intracerebral transplant, MG = microglia, fetal br = fetal brain donor tissue, fetal liv = fetal liver donor tissue, BM = bone marrow, MG (Cult CTL) = WT microglia purified in parallel to MGs used for culture ICTs, BMT = MLCs derived from peripheral bone marrow transplantation.

Figure S5, related to Figures 4,5

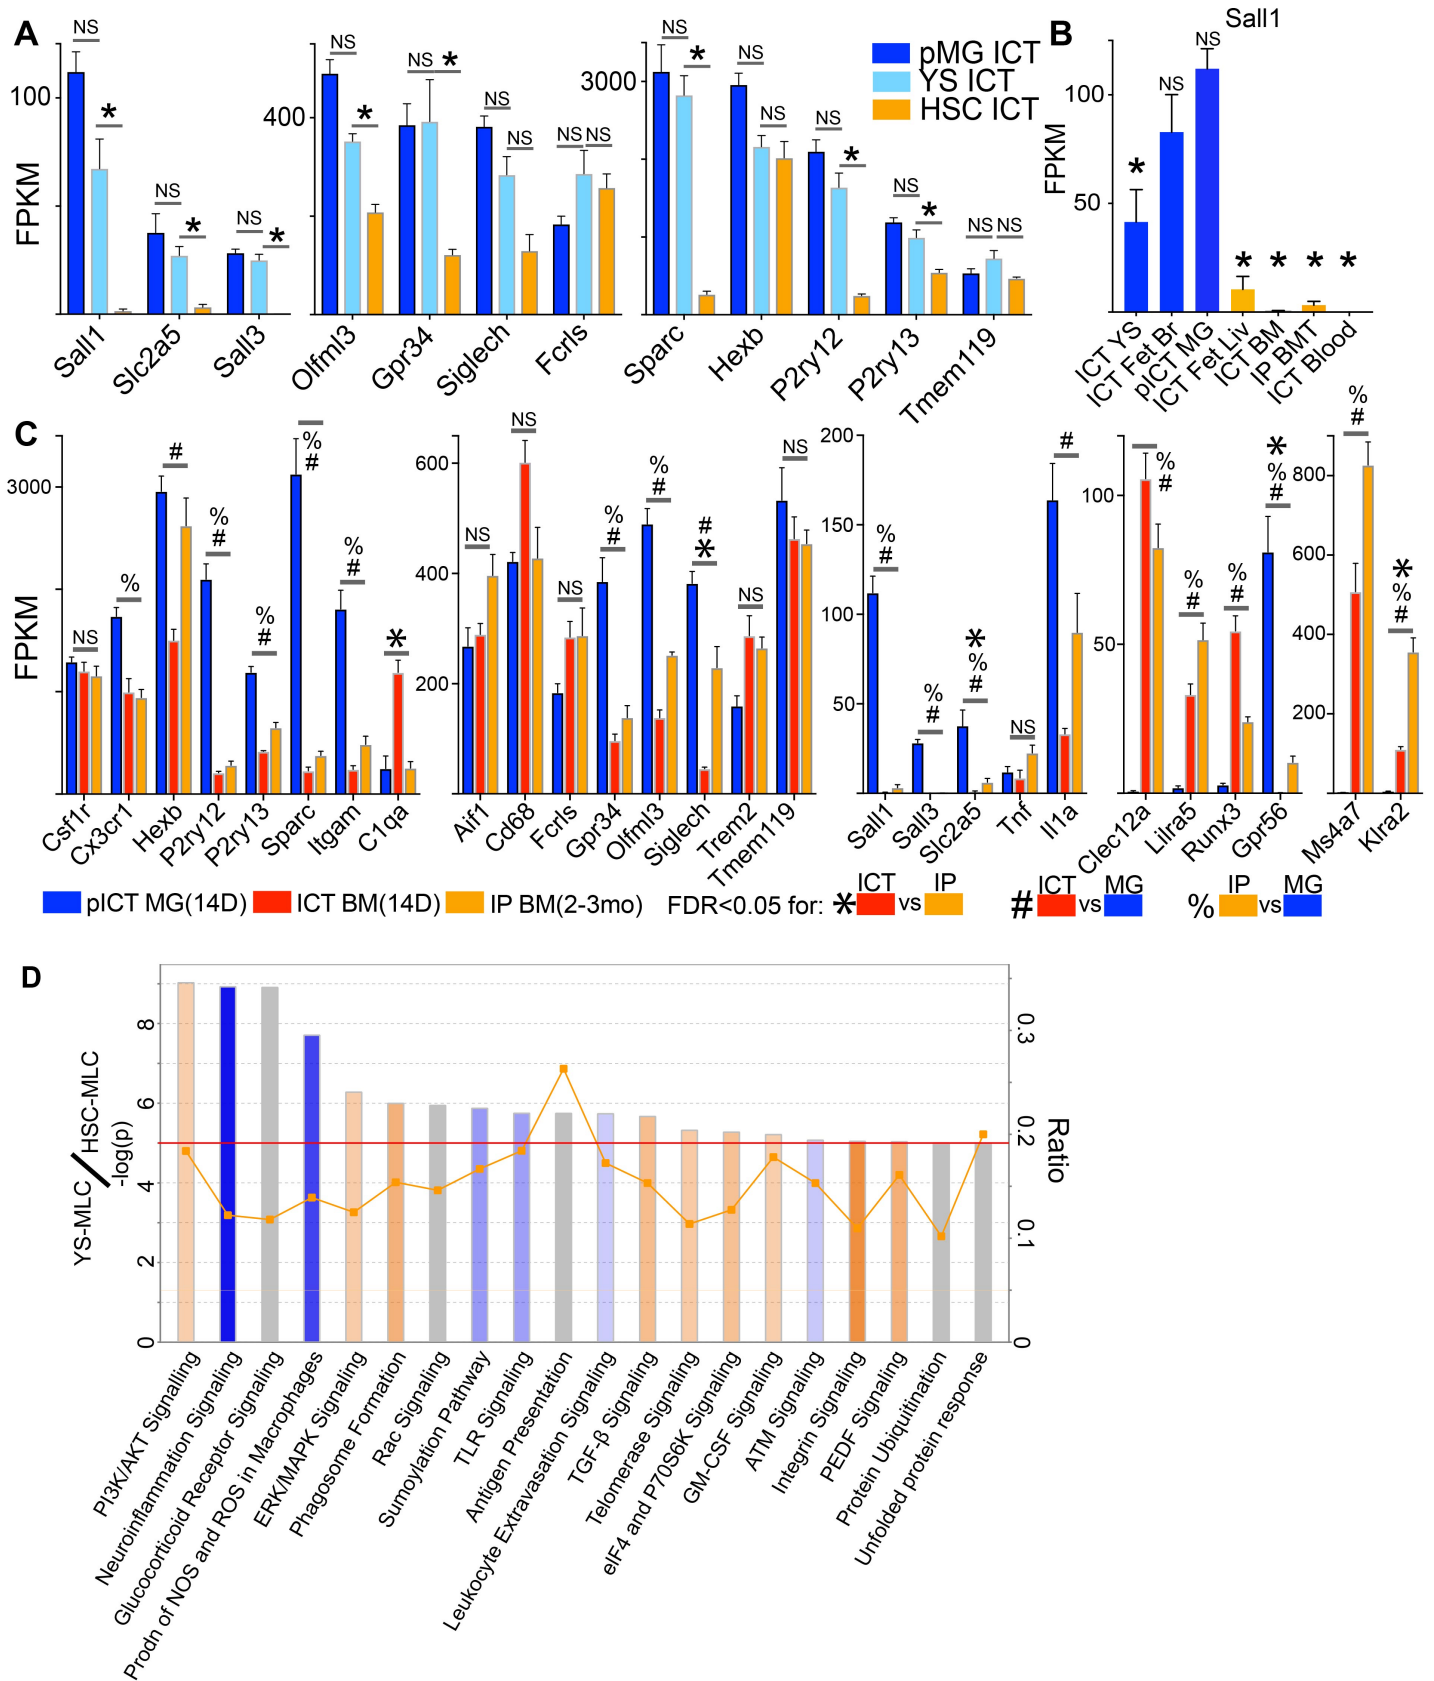

**Figure S5, related to Figures 4,5. Ontogeny but not prolonged CNS residence results in faithful expression of microglial genes.** A) Signature gene expression in microglia, HSC- and YS-MLCs. \* = FDR < 0.05. Error bars depict SEM. B) *Sall1* expression (in FPKM) by microglia and MLCs of YS (blue) and HSC (orange) origin. \* = FDR<0.05, NS = not significant. Error bars represent SEM. C) Relative expression of myeloid genes in ICT microglia (blue), ICT BM (red, 14 day brain residence), and IP BMT (orange, 2-3 month brain residence). NS indicates no statistical difference between any pairwise comparison. \*, FDR < 0.05 comparing ICT BM to IP BMT. #, FDR<0.05 comparing ICT BM to pICT MG. %, FDR<0.05 comparing IP BMT to pICT MG. Error bars depict SEM. D) Ingenuity Pathway Analysis® comparing YS- to HSC-MLCs for pathways with  $-\log(p) > 5$  cutoff (red line). Orange line shows fraction of genes in pathway that are differentially expressed. Orange bars show positive association of pathway with YS-MLCs, blue bars with HSC-MLCs, gray bars represent indeterminate direction of association.

Figure S6, related to Figure 6

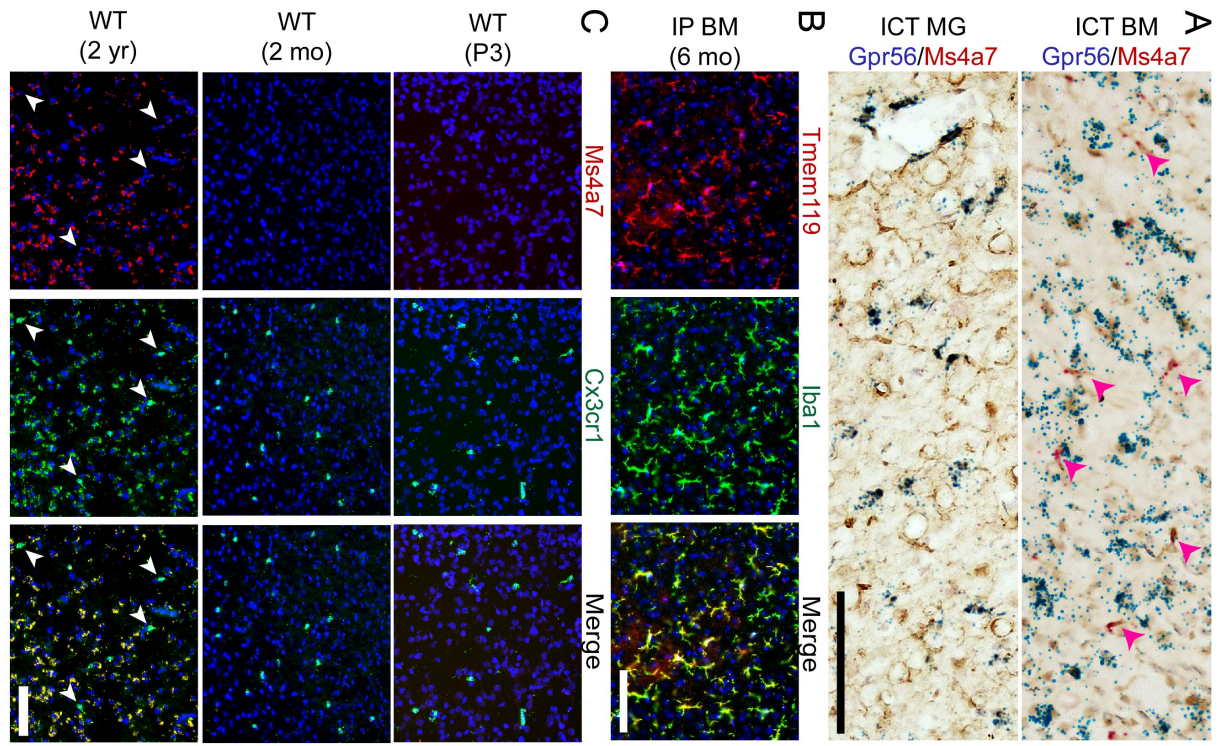

BM ICT → Cx3Cr1-CreER<sup>+/-</sup>; Csf1r fl/fl

Adultl ICT, Harvest t = 2 mo

Neonatal ICT, Harvest t = 2 mo

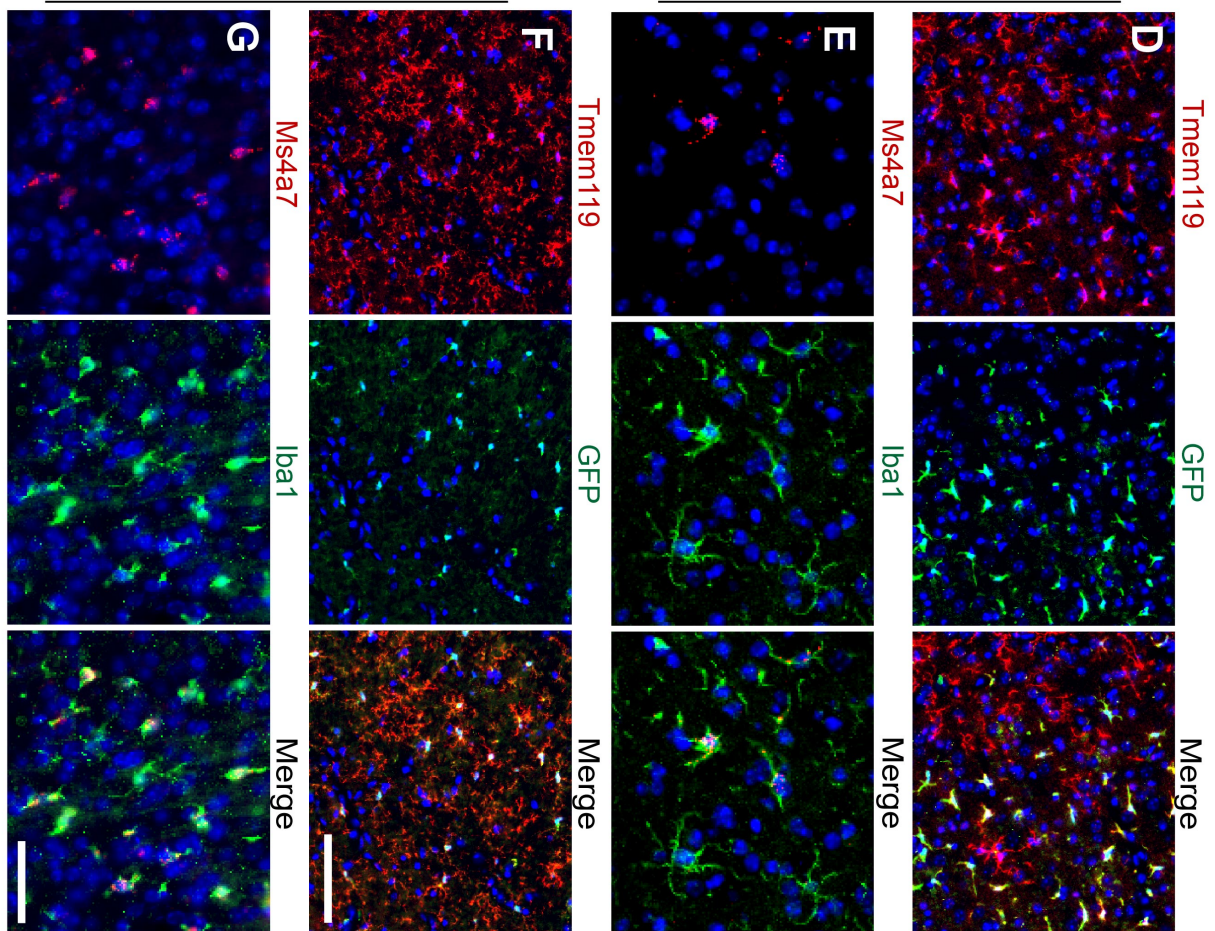

**Figure S6, related to Figure 6. HSC-MLCs persist in the brain for long periods, and show distinct expression of origin markers in multiple transplantation systems.** (A) RNA *In situ* hybridization for *Gpr56* (blue) and *Ms4a7* (red) in BM-MLCs, ICT MGs. Scale bar = 100 $\mu$ m, arrowheads highlight *Ms4a7*<sup>+</sup> cells. (B) Immunostaining shows persistent residence and expression of TMEM119 (red) and IBA1 (green) by MLCs 6 months after transplantation. (C) RNA *In situ* hybridization for *Ms4a7* (red) and *Cx3cr1* (green) shows absence of *Ms4a7*<sup>+</sup> cells in the brain parenchyma of WT animals at 3 days, 2 months, and 2 years. Arrowheads depict *Cx3cr1*<sup>+</sup>/*Ms4a7*<sup>-</sup> macrophages in 2 year-old animals, to distinguish from vast autofluorescence. Scale bar = 100 $\mu$ m. (D,F) TMEM119 (red) and donor cell marker (green) expression 2 months after BM ICT into tamoxifen-injected *Cx3cr1*-CreER;*Csf1r* fl/fl neonates (D) or adults (F), showing that donor cells intermix with host, ramify and express TMEM119. (E,G) RNA *In situ* hybridization and protein staining of the same tissue for *Ms4a7* (red) and IBA1 protein (green) shows *Ms4a7*<sup>+</sup> macrophages in the same pattern as donor cells from nearby immunostained sections, intermixed with *Ms4a7*<sup>-</sup> cells 2 months after neonatal (E) or adult (G) transplantation. Scale bars = 100 $\mu$ m (D,F), 50 $\mu$ m (E,G)

Figure S7, related to figure 7

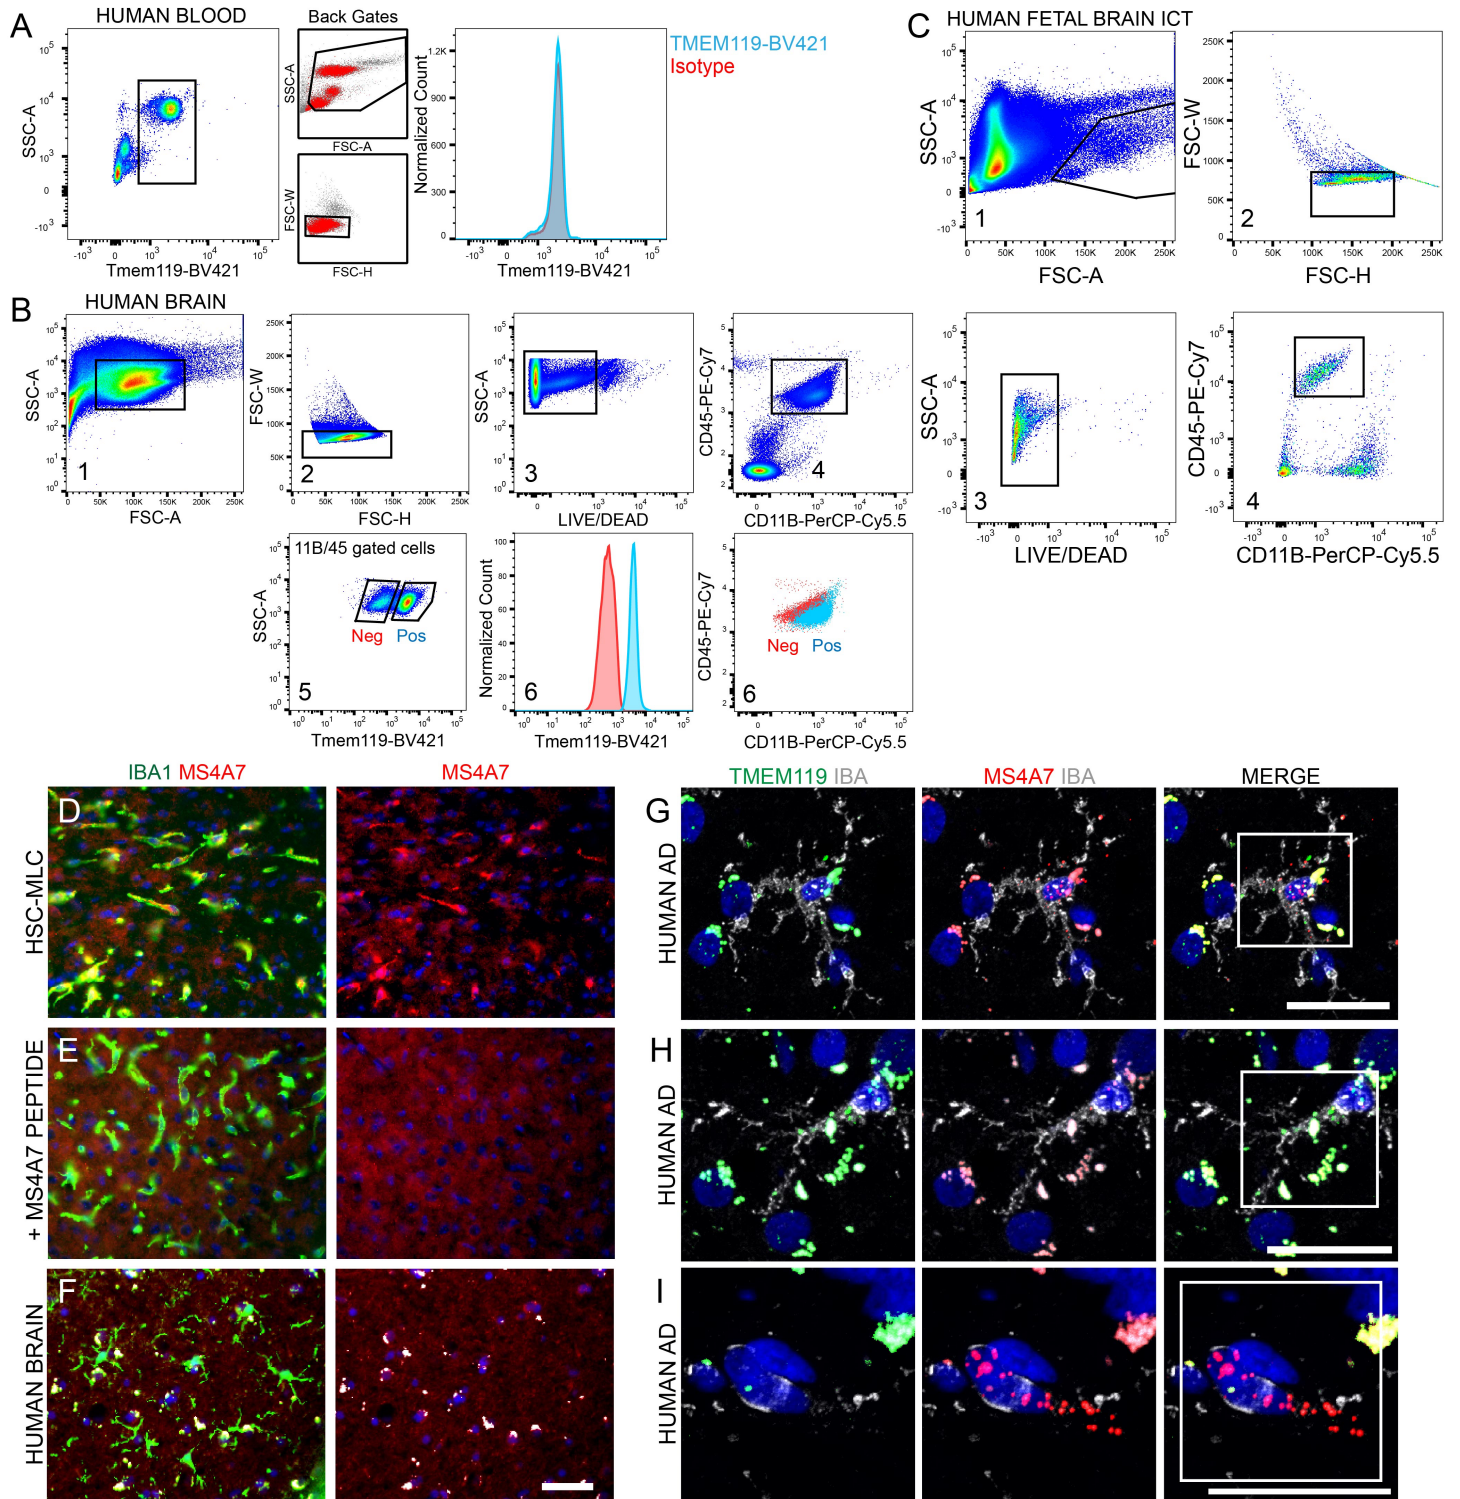

**Figure S7, related to Figure 7. Validation of human TMEM119 monoclonal antibody and MS4A7 antibody specificity.** (A) Mouse anti-hTMEM119 monoclonal clone A16075D does not stain human blood (blue) above isotype control (red) but (B) does stain most CD45/11B double positive cells from the brain, resolving a mixed double positive population into two otherwise inseparable groups. Numbers in lower left corner of plots shows gate hierarchy (1>2>3>4>5>6). (C) Gating strategy related to Figure 7E, numbers in lower left corner of plots shows gate hierarchy (1>2>3>4). Histogram in main Figure depicts cells in gate 4 from TMEM119 stained vs isotype control stain. D) Engrafted human blood cells immunostained with antibodies against IBA1 (green) and MS4A7 (red). E) Engrafted human blood cells stained with antibodies against IBA1 (green) and MS4A7 pre-incubated with molar excess of immunizing peptide (red) F) Human surgical sample stained with antibodies against IBA1 and MS4A7, and overlaid with signal from unstained channel to identify tissue autofluorescence (light yellow in left panel, white in right panel). Scale bar = 50 $\mu$ m. (G-I) Full images of cells shown in Figures 7I-7K, with area of cropping designated by a white square. Scale bars = 25 $\mu$ m.

Table 1. Differential gene expression in ICT vs WT microglia, related to Figure 1.

| Gene                 | WT MG   | pICTMG | log2 (WT/ICT) | FDR   | Gene                 | WT MG | pICTMG | log2 (WT/ICT) | FDR   |
|----------------------|---------|--------|---------------|-------|----------------------|-------|--------|---------------|-------|
| <i>Hlf</i>           | 30.0    | 2.0    | 3.93          | 0.000 | <i>Gm14023</i>       | 18.9  | 55.2   | -1.25         | 0.029 |
| <i>Gpr165</i>        | 389.1   | 32.3   | 3.69          | 0.000 | <i>Icosl</i>         | 18.1  | 46.1   | -1.26         | 0.020 |
| <i>Serpine2</i>      | 91.1    | 10.9   | 3.16          | 0.000 | <i>ApoE</i>          | 236.5 | 590.0  | -1.26         | 0.041 |
| <i>Khdrbs3</i>       | 33.6    | 5.0    | 2.49          | 0.000 | <i>D10Wsu52e</i>     | 14.8  | 39.6   | -1.29         | 0.008 |
| <i>Casc4</i>         | 43.1    | 9.1    | 2.39          | 0.000 | <i>Rnf150</i>        | 9.4   | 23.9   | -1.29         | 0.001 |
| <i>Rab6b</i>         | 32.3    | 7.3    | 2.21          | 0.000 | <i>Cd84</i>          | 62.0  | 162.1  | -1.32         | 0.001 |
| <i>Snx9</i>          | 25.7    | 16.8   | 2.10          | 0.001 | <i>Rgs1</i>          | 172.5 | 474.6  | -1.33         | 0.002 |
| <i>Nav2</i>          | 28.5    | 8.0    | 1.88          | 0.000 | <i>Slc17a5</i>       | 11.8  | 30.1   | -1.34         | 0.041 |
| <i>F9</i>            | 47.9    | 14.1   | 1.87          | 0.002 | <i>Man2a1</i>        | 10.2  | 25.8   | -1.37         | 0.000 |
| <i>Lst1</i>          | 45.4    | 19.5   | 1.82          | 0.001 | <i>Hmox1</i>         | 8.5   | 20.8   | -1.38         | 0.004 |
| <i>Ccl9</i>          | 93.4    | 29.5   | 1.78          | 0.000 | <i>Myc</i>           | 12.6  | 35.1   | -1.39         | 0.010 |
| <i>Ccl6</i>          | 44.9    | 13.4   | 1.77          | 0.007 | <i>Csf2ra</i>        | 41.2  | 117.6  | -1.45         | 0.001 |
| <i>Tspan13</i>       | 69.6    | 21.1   | 1.77          | 0.000 | <i>Tank</i>          | 9.5   | 20.7   | -1.46         | 0.006 |
| <i>Csmd3</i>         | 41.9    | 13.0   | 1.73          | 0.001 | <i>Ifi30</i>         | 29.6  | 89.3   | -1.47         | 0.001 |
| <i>Ngn</i>           | 25.9    | 8.0    | 1.68          | 0.001 | <i>Syt6</i>          | 13.2  | 36.6   | -1.49         | 0.001 |
| <i>Hnmt</i>          | 31.7    | 10.1   | 1.67          | 0.004 | <i>Osm</i>           | 6.6   | 21.6   | -1.53         | 0.017 |
| <i>Tspan7</i>        | 76.8    | 27.4   | 1.57          | 0.000 | <i>Neat1</i>         | 11.8  | 35.9   | -1.54         | 0.031 |
| <i>Fam102b</i>       | 139.1   | 50.6   | 1.50          | 0.000 | <i>3200002M19Rik</i> | 14.9  | 54.0   | -1.55         | 0.004 |
| <i>D0H4S114</i>      | 53.5    | 21.9   | 1.46          | 0.003 | <i>Lilrb4</i>        | 4.7   | 27.1   | -1.55         | 0.001 |
| <i>Wrb</i>           | 25.3    | 9.9    | 1.43          | 0.025 | <i>Cd52</i>          | 17.9  | 54.9   | -1.56         | 0.030 |
| <i>Znrf1</i>         | 37.2    | 13.4   | 1.40          | 0.007 | <i>Lrrc3</i>         | 56.4  | 178.5  | -1.57         | 0.000 |
| <i>Ets1</i>          | 47.2    | 19.7   | 1.32          | 0.000 | <i>C3ar1</i>         | 42.8  | 134.0  | -1.57         | 0.000 |
| <i>Ccr5</i>          | 674.4   | 287.3  | 1.30          | 0.000 | <i>Tlr2</i>          | 8.1   | 24.7   | -1.61         | 0.001 |
| <i>Gprasp1</i>       | 26.7    | 11.8   | 1.28          | 0.001 | <i>Smc4</i>          | 10.5  | 34.7   | -1.70         | 0.011 |
| <i>Cst3</i>          | 20034.9 | 8776.6 | 1.28          | 0.020 | <i>Ms4a6b</i>        | 20.1  | 62.7   | -1.77         | 0.000 |
| <i>Jam2</i>          | 67.9    | 28.8   | 1.27          | 0.001 | <i>C030034L19Rik</i> | 9.5   | 38.1   | -1.79         | 0.000 |
| <i>Zbtb20</i>        | 25.3    | 12.1   | 1.26          | 0.045 | <i>H60b</i>          | 2.9   | 20.4   | -1.80         | 0.000 |
| <i>Tuba1a</i>        | 73.8    | 44.3   | 1.23          | 0.003 | <i>Ccl2</i>          | 5.6   | 23.2   | -1.88         | 0.001 |
| <i>Zfp691</i>        | 58.7    | 26.9   | 1.21          | 0.003 | <i>Ccl2</i>          | 31.5  | 182.9  | -1.90         | 0.001 |
| <i>Basp1</i>         | 162.0   | 76.4   | 1.19          | 0.002 | <i>Gpr160</i>        | 6.7   | 27.4   | -1.94         | 0.001 |
| <i>Prkaca</i>        | 40.3    | 19.5   | 1.17          | 0.005 | <i>Cdkn1a</i>        | 18.0  | 74.4   | -1.96         | 0.007 |
| <i>0610040J01Rik</i> | 40.3    | 19.2   | 1.15          | 0.006 | <i>Fmn1</i>          | 6.1   | 25.6   | -2.02         | 0.000 |
| <i>Idua</i>          | 24.6    | 12.6   | 1.13          | 0.045 | <i>Dab2</i>          | 7.3   | 35.0   | -2.09         | 0.000 |
| <i>Gpr155</i>        | 153.7   | 74.8   | 1.13          | 0.018 | <i>Ccr1</i>          | 13.0  | 63.1   | -2.17         | 0.000 |
| <i>Cdk5r1</i>        | 20.6    | 10.7   | 1.10          | 0.030 | <i>Gm16907</i>       | 3.8   | 22.7   | -2.24         | 0.000 |
| <i>Sema4b</i>        | 29.2    | 15.3   | 1.06          | 0.010 | <i>Ccl12</i>         | 38.8  | 254.6  | -2.47         | 0.000 |
| <i>Fscn1</i>         | 109.4   | 56.2   | 1.04          | 0.023 | <i>Ms4a6c</i>        | 5.9   | 30.7   | -2.47         | 0.000 |
| <i>Crybb1</i>        | 113.0   | 51.1   | 1.04          | 0.002 | <i>H2-DMb1</i>       | 3.8   | 23.5   | -2.48         | 0.000 |
| <i>Tppp</i>          | 24.4    | 12.7   | 1.02          | 0.007 | <i>Pvt1</i>          | 3.3   | 21.3   | -2.58         | 0.000 |
| <i>1110004F10Rik</i> | 40.2    | 20.8   | 1.01          | 0.035 | <i>Myo5a</i>         | 4.7   | 29.3   | -2.60         | 0.000 |
| <i>Bcl9l</i>         | 36.6    | 19.1   | 1.00          | 0.012 | <i>Ctla2b</i>        | 5.3   | 33.2   | -2.62         | 0.000 |
| <i>Stab1</i>         | 16.2    | 34.7   | -1.00         | 0.044 | <i>Ctse</i>          | 2.9   | 28.4   | -3.14         | 0.000 |
| <i>P2rx4</i>         | 12.3    | 22.5   | -1.03         | 0.032 | <i>Lyz2</i>          | 22.9  | 230.4  | -3.26         | 0.000 |
| <i>Nfkbiz</i>        | 47.3    | 117.4  | -1.12         | 0.007 | <i>Cd34</i>          | 6.0   | 63.4   | -3.32         | 0.000 |
| <i>Vps13c</i>        | 11.6    | 27.2   | -1.13         | 0.000 | <i>1810011O10Rik</i> | 2.8   | 41.4   | -3.44         | 0.000 |
| <i>Fth1</i>          | 313.3   | 781.4  | -1.13         | 0.001 | <i>H2-DMa</i>        | 2.3   | 25.9   | -3.56         | 0.000 |
| <i>Tpd52</i>         | 10.2    | 22.3   | -1.14         | 0.006 | <i>Mki67</i>         | 2.4   | 36.5   | -3.84         | 0.002 |
| <i>Rpl32</i>         | 48.5    | 104.1  | -1.15         | 0.048 | <i>Mrc1</i>          | 4.8   | 60.8   | -3.85         | 0.000 |
| <i>C5ar1</i>         | 17.8    | 41.8   | -1.17         | 0.020 | <i>Srgn</i>          | 7.0   | 106.6  | -3.92         | 0.000 |
| <i>AU040972</i>      | 8.8     | 20.8   | -1.20         | 0.041 | <i>Niacr1</i>        | 0.6   | 22.1   | -4.42         | 0.000 |
| <i>Afap111</i>       | 9.4     | 20.6   | -1.21         | 0.018 | <i>1300014I06Rik</i> | 0.4   | 20.1   | -4.71         | 0.000 |
| <i>Clec5a</i>        | 13.4    | 34.7   | -1.21         | 0.003 | <i>Gpr65</i>         | 1.8   | 65.3   | -5.16         | 0.000 |
| <i>Il1a</i>          | 55.6    | 163.9  | -1.22         | 0.020 | <i>Fxyd5</i>         | 0.4   | 29.6   | -6.18         | 0.000 |
| <i>Ctsh</i>          | 48.0    | 108.6  | -1.23         | 0.000 | <i>Msr1</i>          | 0.2   | 37.2   | -6.69         | 0.000 |
| <i>Alox5</i>         | 11.0    | 26.6   | -1.24         | 0.048 | <i>Fn1</i>           | 0.1   | 27.4   | -7.85         | 0.000 |
| <i>Man2b1</i>        | 136.4   | 340.0  | -1.25         | 0.000 |                      |       |        |               |       |



**Table S1, related to Figure 1. Differentially expressed genes between ICT-MGs and WT-MGs.** Columns (left to right) show gene name, FPKM in WT MG and pooled ICT-MGs, log<sub>2</sub>(fold change), and false discovery rate (FDR) from edgeR comparison. Differential gene expression (DGE) was filtered for at least 2-fold change, FPKM>20 in at least 1 sample, and FDR <0.05.

Table S2: Expression of microglia enriched genes in MLCs, related to Figure 4.

| Gene          | pICT<br>MG | ICT<br>YSS | ICT<br>HSC | Log2<br>(YSS/<br>MG) | p-<br>value | Log2<br>(HSC/<br>MG) | p-<br>value | Log2<br>(YSS/<br>HSC) | p-<br>value |
|---------------|------------|------------|------------|----------------------|-------------|----------------------|-------------|-----------------------|-------------|
| Sicz2a5       | 37.7       | 27.1       | 3.2        | -0.55                | 0.19        | -3.63                | 0.00        | 3.08                  | 0.00        |
| P2ry12        | 2097.3     | 1636.9     | 244.3      | -0.39                | 0.14        | -3.05                | 0.00        | 2.68                  | 0.00        |
| Asph          | 196.4      | 124.1      | 27.3       | -0.60                | 0.04        | -2.91                | 0.00        | 2.33                  | 0.00        |
| Gpi34         | 385.2      | 392.1      | 121.4      | -0.01                | 0.99        | -1.67                | 0.00        | 1.69                  | 0.00        |
| Ccr5          | 287.3      | 155.7      | 50.6       | -0.93                | 0.00        | -2.58                | 0.00        | 1.67                  | 0.00        |
| Fam110a       | 15.9       | 14.7       | 5.3        | -0.17                | 0.70        | -1.67                | 0.00        | 1.51                  | 0.00        |
| Cd164         | 638.0      | 619.8      | 231.5      | -0.08                | 0.74        | -1.49                | 0.00        | 1.43                  | 0.00        |
| Pnp           | 98.9       | 87.9       | 37.8       | -0.35                | 0.13        | -1.49                | 0.00        | 1.15                  | 0.00        |
| Epb4.112      | 576.2      | 551.2      | 265.8      | -0.18                | 0.42        | -1.28                | 0.00        | 1.11                  | 0.00        |
| Golm1         | 228.4      | 241.4      | 115.3      | 0.01                 | 0.96        | -1.06                | 0.00        | 1.09                  | 0.00        |
| 9330133014Rik | 10.5       | 9.9        | 4.7        | -0.13                | 0.75        | -1.15                | 0.00        | 1.04                  | 0.02        |
| P2ry13        | 1188.6     | 991.0      | 541.5      | -0.30                | 0.22        | -1.20                | 0.00        | 0.92                  | 0.00        |
| Commnd8       | 76.8       | 71.7       | 41.2       | -0.10                | 0.72        | -1.00                | 0.00        | 0.92                  | 0.00        |
| Cfh           | 280.0      | 236.8      | 125.8      | -0.10                | 0.32        | -1.15                | 0.00        | 0.91                  | 0.00        |
| Fam102b       | 50.6       | 32.4       | 17.8       | -0.10                | 0.03        | -1.60                | 0.00        | 0.89                  | 0.00        |
| Casp8         | 169.5      | 141.9      | 77.1       | -0.10                | 0.34        | -1.07                | 0.00        | 0.82                  | 0.00        |
| Gal3st4       | 100.9      | 87.9       | 56.5       | -0.10                | 0.35        | -1.04                | 0.00        | 0.81                  | 0.00        |
| Ofim3         | 489.7      | 352.2      | 208.0      | -0.10                | 0.04        | -1.27                | 0.00        | 0.80                  | 0.00        |
| Rth4r1        | 56.1       | 42.4       | 25.6       | -0.10                | 0.06        | -1.25                | 0.00        | 0.75                  | 0.01        |
| 6230427J02Rik | 17.9       | 36.6       | 21.2       | -0.10                | 0.01        | 0.35                 | 0.30        | 0.73                  | 0.03        |
| Timm119       | 533.0      | 724.2      | 464.4      | -0.10                | 0.13        | -0.26                | 0.23        | 0.72                  | 0.00        |
| 0610040J01Rik | 19.2       | 18.3       | 11.4       | -0.10                | 0.82        | -0.76                | 0.01        | 0.70                  | 0.04        |
| Entpd1        | 268.5      | 219.0      | 141.9      | -0.10                | 0.15        | -1.01                | 0.00        | 0.69                  | 0.00        |
| Zfp715        | 38.5       | 42.7       | 29.4       | -0.10                | 0.73        | -0.47                | 0.06        | 0.59                  | 0.03        |
| D15Erttd621e  | 106.5      | 87.6       | 58.9       | -0.10                | 0.11        | -0.92                | 0.00        | 0.58                  | 0.01        |
| Cntm6         | 110.8      | 99.7       | 72.7       | -0.10                | 0.51        | -0.67                | 0.00        | 0.50                  | 0.03        |
| Abca9         | 226.8      | 236.5      | 180.3      | -0.10                | 0.89        | -0.48                | 0.01        | 0.47                  | 0.01        |
| Iifg1         | 319.8      | 341.2      | 261.4      | -0.10                | 0.82        | -0.36                | 0.10        | 0.43                  | 0.05        |
| Stgap2        | 125.4      | 97.9       | 78.0       | -0.10                | 0.08        | -0.80                | 0.00        | 0.42                  | 0.02        |
| Plekho1       | 217.3      | 210.4      | 162.9      | -0.10                | 0.39        | -0.61                | 0.00        | 0.41                  | 0.08        |
| Timm173       | 93.0       | 84.4       | 66.6       | -0.10                | 0.52        | -0.57                | 0.01        | 0.40                  | 0.08        |
| Rnese4        | 650.4      | 1106.7     | 870.1      | -0.10                | 0.00        | 0.40                 | 0.07        | 0.39                  | 0.05        |
| Serrnc3       | 1876.7     | 1984.5     | 1596.0     | -0.10                | 0.81        | -0.30                | 0.10        | 0.37                  | 0.05        |
| Elmo1         | 149.4      | 117.1      | 95.1       | -0.10                | 0.06        | -0.80                | 0.00        | 0.36                  | 0.06        |
| Smap2         | 139.7      | 113.9      | 93.7       | -0.10                | 0.12        | -0.71                | 0.00        | 0.34                  | 0.09        |
| Tgfb1         | 569.2      | 513.8      | 416.1      | -0.10                | 0.45        | -0.51                | 0.02        | 0.34                  | 0.10        |
| Tnfalp82      | 33.0       | 55.9       | 48.2       | -0.10                | 0.04        | 0.45                 | 0.15        | 0.33                  | 0.32        |
| Gna15         | 22.0       | 26.3       | 24.5       | -0.10                | 1.00        | -0.30                | 0.20        | 0.32                  | 0.21        |
| B4gal4        | 15.9       | 12.6       | 8.9        | -0.10                | 0.19        | -0.80                | 0.02        | 0.30                  | 0.45        |
| Mei2c         | 171.4      | 172.0      | 148.1      | -0.02                | 0.95        | -0.29                | 0.09        | 0.29                  | 0.11        |
| Mylip         | 59.2       | 60.7       | 48.4       | -0.14                | 0.62        | -0.40                | 0.06        | 0.28                  | 0.27        |
| 4632428N05Rik | 244.0      | 237.5      | 205.0      | -0.08                | 0.73        | -0.34                | 0.05        | 0.28                  | 0.11        |
| Sico2b1       | 280.3      | 323.1      | 277.3      | 0.16                 | 0.55        | -0.09                | 0.67        | 0.26                  | 0.26        |
| Fcrl3         | 183.5      | 286.2      | 257.4      | 0.66                 | 0.03        | 0.50                 | 0.05        | 0.17                  | 0.56        |
| Hexb          | 2956.8     | 2161.0     | 2016.1     | -0.54                | 0.02        | -0.68                | 0.00        | 0.16                  | 0.51        |
| Rgs10         | 292.9      | 203.7      | 207.0      | -0.50                | 0.03        | -0.63                | 0.00        | 0.14                  | 0.50        |
| Srsf9         | 74.4       | 82.1       | 79.9       | 0.14                 | 0.64        | 0.03                 | 0.89        | 0.12                  | 0.63        |
| 0610007C21Rik | 50.3       | 72.3       | 66.8       | 0.55                 | 0.20        | 0.45                 | 0.15        | 0.11                  | 0.78        |
| Orai1         | 25.2       | 24.4       | 23.7       | -0.13                | 0.66        | -0.20                | 0.47        | 0.09                  | 0.76        |
| Tmem55b       | 47.1       | 48.0       | 43.1       | -0.29                | 0.33        | -0.36                | 0.13        | 0.08                  | 0.77        |
| Fam105a       | 166.9      | 183.6      | 184.2      | 0.13                 | 0.61        | 0.10                 | 0.61        | 0.04                  | 0.85        |
| Itpip1        | 35.4       | 39.3       | 40.5       | 0.16                 | 0.53        | 0.14                 | 0.59        | 0.04                  | 0.88        |
| Ophn1         | 74.2       | 76.1       | 74.7       | -0.13                | 0.62        | -0.12                | 0.56        | 0.01                  | 0.96        |
| Stf2d1        | 38.0       | 36.4       | 39.8       | -0.41                | 0.27        | -0.40                | 0.18        | 0.00                  | 1.00        |
| Rab311        | 35.7       | 47.8       | 52.8       | 0.48                 | 0.15        | 0.51                 | 0.09        | -0.02                 | 0.95        |
| Lair1         | 329.9      | 198.1      | 213.3      | -0.77                | 0.01        | -0.72                | 0.00        | -0.03                 | 0.91        |
| Ippp5d        | 118.6      | 121.9      | 131.7      | -0.10                | 0.72        | -0.04                | 0.84        | -0.05                 | 0.85        |
| Ihm2b         | 608.1      | 658.4      | 718.9      | 0.05                 | 0.83        | 0.15                 | 0.50        | -0.08                 | 0.74        |
| Pycard        | 29.5       | 16.6       | 18.4       | -0.86                | 0.01        | -0.77                | 0.01        | -0.08                 | 0.81        |
| Lpar6         | 126.8      | 139.9      | 156.3      | 0.11                 | 0.67        | 0.24                 | 0.30        | -0.11                 | 0.69        |
| Asb2          | 5.0        | 4.9        | 5.4        | -0.21                | 0.59        | -0.10                | 0.76        | -0.11                 | 0.78        |
| Ilgb5         | 120.3      | 141.7      | 155.8      | 0.15                 | 0.55        | 0.28                 | 0.21        | -0.12                 | 0.64        |
| Ctsd          | 4098.4     | 3168.3     | 3629.6     | -0.39                | 0.10        | -0.19                | 0.42        | -0.18                 | 0.48        |
| Stf2d2        | 53.2       | 53.9       | 64.3       | -0.09                | 0.75        | 0.18                 | 0.42        | -0.25                 | 0.18        |
| Af251705      | 95.3       | 105.3      | 116.4      | -0.14                | 0.57        | 0.17                 | 0.41        | -0.29                 | 0.23        |
| Blnk          | 74.7       | 66.9       | 77.5       | -0.47                | 0.19        | -0.15                | 0.49        | -0.31                 | 0.33        |
| Ilt10ra       | 77.7       | 94.9       | 123.3      | 0.19                 | 0.53        | 0.52                 | 0.05        | -0.32                 | 0.16        |
| BC004004      | 14.0       | 12.0       | 18.0       | -0.19                | 0.62        | 0.18                 | 0.58        | -0.35                 | 0.35        |
| Gp160         | 27.4       | 39.1       | 49.9       | 0.39                 | 0.24        | 0.77                 | 0.01        | -0.36                 | 0.19        |
| Cysltf1       | 30.2       | 29.7       | 37.2       | -0.11                | 0.75        | 0.28                 | 0.28        | -0.37                 | 0.20        |
| Tmem2         | 159.3      | 199.4      | 271.6      | 0.27                 | 0.32        | 0.71                 | 0.00        | -0.52                 | 0.04        |
| Ptatr         | 17.6       | 17.9       | 27.7       | 0.00                 | 1.00        | 0.54                 | 0.04        | -0.42                 | 0.10        |
| Zfp658        | 20.7       | 19.7       | 32.0       | -0.17                | 0.60        | 0.51                 | 0.05        | -0.67                 | 0.02        |
| Tmem37        | 11.1       | 23.5       | 42.0       | 1.08                 | 0.01        | 1.78                 | 0.00        | -0.69                 | 0.08        |
| Pmepa1        | 165.6      | 170.4      | 353.3      | 0.02                 | 0.95        | 1.04                 | 0.00        | -1.01                 | 0.00        |
| Ldhb          | 2.4        | 0.8        | 16.0       | NA                   | NA          | 2.45                 | 0.00        | -3.78                 | 0.00        |
| Lipih         | 0.8        | 0.9        | 0.0        | NA                   | NA          | NA                   | NA          | NA                    | NA          |

**Table S2, related to Figure 4. Expression of microglia-enriched gene cassette from Bennett et al 2016 in ICT-MGs, HSC- and YS-MLCs.** Columns (left to right) show gene name, FPKM values, Log<sub>2</sub>(fold change) for 3 relevant comparisons, and associated p-values. Colored genes indicate DGE between YS- and HSC-MLCs (2 fold cutoff, FDR<0.05, FPKM >20). Genes colored blue were closer to MG levels in YS-MLCs, while genes colored orange were closer in HSC-MLCs.

Table S3: Expression of TMEM119- myeloid cell enriched gene cassette in MLCs, related to Figure 4.

| Gene          | pICT<br>MG | ICT<br>Yss | ICT<br>HSCs | Log2<br>(Yss/<br>MG) | p-<br>value | Log2<br>(HSC/<br>MG) | p-<br>value | Log2<br>(Yss/<br>HSC) | p-<br>value |
|---------------|------------|------------|-------------|----------------------|-------------|----------------------|-------------|-----------------------|-------------|
| H2-Aa         | 9.4        | 13.3       | 469.7       | 0.43                 | 0.53        | 5.50                 | 0.00        | -5.04                 | 0.00        |
| H2-Ab1        | 5.1        | 7.4        | 194.4       | 0.53                 | 0.46        | 5.20                 | 0.00        | -4.65                 | 0.00        |
| Al607873      | 1.5        | 3.5        | 68.8        | 1.29                 | 0.03        | 5.64                 | 0.00        | -4.31                 | 0.00        |
| Klra2         | 3.5        | 12.7       | 233.9       | 1.70                 | 0.06        | 5.90                 | 0.00        | -4.17                 | 0.00        |
| C3            | 2.6        | 0.9        | 10.9        | -1.94                | 0.01        | 1.97                 | 0.00        | -3.90                 | 0.00        |
| C3300id       | 0.8        | 1.1        | 16.7        | NA                   | NA          | 5.03                 | 0.00        | -3.84                 | 0.00        |
| Lyz2          | 230.4      | 446.8      | 5880.4      | 0.90                 | 0.01        | 4.67                 | 0.00        | -3.76                 | 0.00        |
| CD74          | 76.2       | 78.5       | 966.8       | -0.07                | 0.89        | 3.60                 | 0.00        | -3.65                 | 0.00        |
| Clec12a       | 0.6        | 8.8        | 81.3        | 3.69                 | 0.00        | 6.99                 | 0.00        | -3.36                 | 0.00        |
| Ccr2          | 3.7        | 1.1        | 6.6         | -1.98                | 0.02        | 1.21                 | 0.24        | -3.18                 | 0.00        |
| Cpne2         | 1.5        | 2.7        | 20.6        | 0.67                 | 0.24        | 3.78                 | 0.00        | -3.13                 | 0.00        |
| Lilrb4        | 27.1       | 35.0       | 246.1       | 0.01                 | 0.99        | 3.12                 | 0.00        | -3.10                 | 0.00        |
| Gp49a         | 7.0        | 6.1        | 38.6        | -1.54                | 0.00        | 1.40                 | 0.00        | -2.93                 | 0.00        |
| C997          | 0.8        | 0.9        | 6.9         | NA                   | NA          | 3.28                 | 0.00        | -2.91                 | 0.00        |
| Athgap15      | 3.5        | 11.4       | 88.5        | 1.89                 | 0.00        | 4.68                 | 0.00        | -2.76                 | 0.00        |
| Cxcl2         | 15.5       | 23.7       | 131.0       | 0.59                 | 0.44        | 3.17                 | 0.00        | -2.56                 | 0.00        |
| Rara          | 0.5        | 1.5        | 8.5         | NA                   | NA          | 3.64                 | 0.00        | -2.52                 | 0.00        |
| Mdal          | 0.9        | 3.5        | 19.1        | NA                   | NA          | 3.51                 | 0.00        | -2.45                 | 0.00        |
| Pibid1        | 1.8        | 2.4        | 22.7        | 0.52                 | 0.46        | 2.92                 | 0.00        | -2.38                 | 0.00        |
| Syne1         | 0.0        | 0.2        | 3.9         | 2.40                 | 0.00        | 4.51                 | 0.00        | -2.07                 | 0.00        |
| Cybb          | 11.3       | 92.5       | 359.2       | 2.94                 | 0.00        | 4.96                 | 0.00        | -2.00                 | 0.00        |
| Neat1         | 35.9       | 34.4       | 125.9       | -0.10                | 0.74        | 1.69                 | 0.00        | -1.79                 | 0.00        |
| Ifitm3        | 10.8       | 29.3       | 106.6       | 1.36                 | 0.06        | 3.15                 | 0.00        | -1.77                 | 0.00        |
| Fxyd5         | 29.6       | 35.8       | 98.8        | 0.28                 | 0.59        | 1.84                 | 0.00        | -1.55                 | 0.00        |
| Il1b          | 2.8        | 3.3        | 8.6         | -0.30                | 0.65        | NA                   | NA          | -1.50                 | 0.00        |
| Rasgrp4       | 2.4        | 1.5        | 4.4         | -0.94                | 0.10        | 0.51                 | 0.18        | -1.41                 | 0.00        |
| Ifitm2        | 12.7       | 29.1       | 79.4        | 1.09                 | 0.02        | 2.47                 | 0.00        | -1.35                 | 0.00        |
| Em2           | 1.5        | 5.8        | 13.7        | 1.84                 | 0.01        | 3.14                 | 0.00        | -1.29                 | 0.11        |
| Sp100         | 3.9        | 13.2       | 30.8        | 1.97                 | 0.00        | 3.11                 | 0.00        | -1.13                 | 0.00        |
| Fam65b        | 3.5        | 3.9        | 11.1        | 0.40                 | 0.48        | 1.49                 | 0.00        | -1.06                 | 0.01        |
| Cd44          | 2.3        | 8.6        | 17.6        | 2.01                 | 0.00        | 3.07                 | 0.00        | -1.04                 | 0.00        |
| Igsf6         | 44.3       | 70.5       | 146.1       | 0.64                 | 0.04        | 1.66                 | 0.00        | -1.00                 | 0.00        |
| Sepp1         | 8.8        | 13.7       | 28.6        | 0.76                 | 0.30        | 1.78                 | 0.00        | -0.98                 | 0.04        |
| Lilrb3        | 7.4        | 7.7        | 20.0        | 0.13                 | 0.81        | 1.11                 | 0.00        | -0.96                 | 0.01        |
| Iloest1       | 6.4        | 4.9        | 8.6         | -0.43                | 0.41        | 0.43                 | 0.21        | -0.85                 | 0.10        |
| Iiga4         | 1.9        | 14.5       | 25.0        | 2.74                 | 0.00        | 3.58                 | 0.00        | -0.82                 | 0.00        |
| Adpgk         | 14.2       | 15.2       | 26.4        | -0.20                | 0.69        | 0.61                 | 0.15        | -0.79                 | 0.02        |
| F630028O10Rik | 8.4        | 22.3       | 34.3        | 1.33                 | 0.00        | 1.93                 | 0.00        | -0.59                 | 0.13        |
| Iqgap1        | 4.5        | 15.7       | 23.2        | 1.78                 | 0.00        | 2.34                 | 0.00        | -0.55                 | 0.13        |
| Pli/a         | 35.6       | 48.9       | 52.1        | 0.36                 | 0.32        | 0.44                 | 0.12        | -0.06                 | 0.87        |
| Vim           | 11.6       | 38.1       | 29.3        | 1.42                 | 0.00        | 1.36                 | 0.02        | 0.07                  | 0.89        |
| Cnn2          | 2.2        | 7.9        | 7.3         | 1.62                 | 0.01        | NA                   | NA          | 0.07                  | 0.88        |
| Mxd1          | 13.7       | 8.3        | 6.3         | -0.83                | 0.06        | -1.13                | 0.00        | 0.32                  | 0.42        |
| Evf2b         | 69.1       | 63.3       | 53.3        | -0.17                | 0.63        | -0.57                | 0.01        | 0.42                  | 0.18        |
| Pram1         | 4.2        | 7.6        | 5.5         | 0.65                 | 0.09        | 0.19                 | 0.60        | 0.47                  | 0.20        |
| Lsp1          | 19.7       | 82.4       | 64.1        | 2.07                 | 0.00        | 1.57                 | 0.00        | 0.50                  | 0.29        |
| Cd24a         | 1.2        | 4.2        | 2.3         | 1.85                 | 0.01        | NA                   | NA          | 0.73                  | 0.34        |
| Ceacam1       | 45.0       | 23.0       | 10.5        | -1.02                | 0.00        | -2.08                | 0.00        | 1.09                  | 0.00        |
| Lyz1          | 0.9        | 0.9        | 22.1        | NA                   | NA          | NA                   | NA          | NA                    | NA          |
| Chip1         | 3.1        | 7.6        | 20.6        | NA                   | NA          | NA                   | NA          | NA                    | NA          |

| Gene          | pICT<br>MG | ICT<br>Yss | ICT<br>HSCs | Log2<br>(Yss/<br>MG) | p-<br>value | Log2<br>(HSC<br>/MG) | p-<br>value | Log2<br>(Yss<br>/HSC) | p-<br>value |
|---------------|------------|------------|-------------|----------------------|-------------|----------------------|-------------|-----------------------|-------------|
| Gm1428        | 3.9        | 6.1        | 17.4        | NA                   | NA          | NA                   | NA          | NA                    | NA          |
| S100a11       | 5.7        | 8.1        | 7.4         | NA                   | NA          | NA                   | NA          | NA                    | NA          |
| Lilrb6        | 2.7        | 2.4        | 6.7         | NA                   | NA          | NA                   | NA          | NA                    | NA          |
| S100a9        | 4.1        | 4.2        | 5.5         | NA                   | NA          | NA                   | NA          | NA                    | NA          |
| Pygl          | 2.3        | 3.3        | 4.9         | 0.44                 | 0.44        | NA                   | NA          | NA                    | NA          |
| S100a8        | 1.8        | 1.0        | 4.1         | NA                   | NA          | NA                   | NA          | NA                    | NA          |
| 2310001H17Rik | 0.6        | 0.6        | 4.1         | NA                   | NA          | NA                   | NA          | NA                    | NA          |
| Fp1           | 0.2        | 0.4        | 3.5         | NA                   | NA          | NA                   | NA          | NA                    | NA          |
| Anxa1         | 0.6        | 7.6        | 3.4         | 3.18                 | 0.00        | NA                   | NA          | NA                    | NA          |
| Pilrb2        | 0.2        | 0.9        | 3.1         | NA                   | NA          | NA                   | NA          | NA                    | NA          |
| H2-Eb1        | 0.0        | 0.2        | 2.7         | NA                   | NA          | NA                   | NA          | NA                    | NA          |
| Fpr2          | 0.2        | 0.0        | 2.3         | NA                   | NA          | NA                   | NA          | NA                    | NA          |
| Avp1          | 0.9        | 1.2        | 2.0         | NA                   | NA          | NA                   | NA          | NA                    | NA          |
| Ngp           | 0.2        | 0.9        | 1.7         | NA                   | NA          | NA                   | NA          | NA                    | NA          |
| 1810033B17Rik | 0.4        | 1.8        | 1.7         | NA                   | NA          | NA                   | NA          | NA                    | NA          |
| H2-Q10        | 0.1        | 0.4        | 1.6         | NA                   | NA          | NA                   | NA          | NA                    | NA          |
| Gsr           | 1.4        | 0.9        | 1.5         | NA                   | NA          | NA                   | NA          | NA                    | NA          |
| S100a6        | 1.1        | 3.4        | 1.3         | NA                   | NA          | NA                   | NA          | NA                    | NA          |
| Gda           | 0.2        | 0.4        | 1.2         | NA                   | NA          | NA                   | NA          | NA                    | NA          |
| Staa21        | 1.4        | 0.2        | 1.1         | NA                   | NA          | NA                   | NA          | NA                    | NA          |
| Ifitm6        | 2.7        | 1.5        | 1.1         | NA                   | NA          | NA                   | NA          | NA                    | NA          |
| Plac8         | 0.0        | 0.9        | 1.1         | NA                   | NA          | NA                   | NA          | NA                    | NA          |
| Relbg         | 0.0        | 1.9        | 1.0         | NA                   | NA          | NA                   | NA          | NA                    | NA          |
| Lcn2          | 0.0        | 0.2        | 0.9         | NA                   | NA          | NA                   | NA          | NA                    | NA          |
| Sell          | 1.0        | 0.1        | 0.8         | NA                   | NA          | NA                   | NA          | NA                    | NA          |
| Gm5483        | 1.8        | 0.0        | 0.7         | NA                   | NA          | NA                   | NA          | NA                    | NA          |
| Samd9l        | 1.2        | 0.9        | 0.6         | -0.47                | 0.62        | NA                   | NA          | NA                    | NA          |
| Gm16894       | 0.5        | 0.8        | 0.6         | NA                   | NA          | NA                   | NA          | NA                    | NA          |
| Sifn4         | 0.0        | 0.0        | 0.5         | NA                   | NA          | NA                   | NA          | NA                    | NA          |
| Atfb4         | 0.4        | 0.6        | 0.5         | NA                   | NA          | NA                   | NA          | NA                    | NA          |
| Camp          | 0.0        | 0.0        | 0.5         | NA                   | NA          | NA                   | NA          | NA                    | NA          |
| Dok2          | 0.9        | 1.3        | 0.5         | NA                   | NA          | NA                   | NA          | NA                    | NA          |
| Eat2          | 0.0        | 0.4        | 0.4         | NA                   | NA          | NA                   | NA          | NA                    | NA          |
| Ifitm1        | 0.0        | 0.0        | 0.4         | NA                   | NA          | NA                   | NA          | NA                    | NA          |
| Pgylp1        | 0.4        | 0.9        | 0.4         | NA                   | NA          | NA                   | NA          | NA                    | NA          |
| Ch33          | 0.0        | 0.5        | 0.2         | NA                   | NA          | NA                   | NA          | NA                    | NA          |
| Sifn1         | 0.0        | 0.3        | 0.2         | NA                   | NA          | NA                   | NA          | NA                    | NA          |
| Mmp8          | 0.0        | 0.2        | 0.1         | NA                   | NA          | NA                   | NA          | NA                    | NA          |
| Cxcr2         | 0.2        | 1.2        | 0.1         | NA                   | NA          | NA                   | NA          | NA                    | NA          |
| Ltf           | 0.1        | 0.0        | 0.1         | NA                   | NA          | NA                   | NA          | NA                    | NA          |
| Trim30b       | 0.6        | 0.3        | 0.1         | NA                   | NA          | NA                   | NA          | NA                    | NA          |
| Lyc62         | 0.0        | 0.0        | 0.1         | NA                   | NA          | NA                   | NA          | NA                    | NA          |
| Hdc           | 0.0        | 0.2        | 0.1         | NA                   | NA          | NA                   | NA          | NA                    | NA          |
| Mmp9          | 0.0        | 0.0        | 0.0         | NA                   | NA          | NA                   | NA          | NA                    | NA          |
| 1100001G20Rik | 0.0        | 0.0        | 0.0         | NA                   | NA          | NA                   | NA          | NA                    | NA          |
| Elane         | 0.0        | 0.0        | 0.0         | NA                   | NA          | NA                   | NA          | NA                    | NA          |
| Hsd11b1       | 0.0        | 0.0        | 0.0         | NA                   | NA          | NA                   | NA          | NA                    | NA          |
| Mpo           | 0.0        | 0.0        | 0.0         | NA                   | NA          | NA                   | NA          | NA                    | NA          |
| Pad14         | 0.0        | 0.0        | 0.0         | NA                   | NA          | NA                   | NA          | NA                    | NA          |
| Sipi          | 1.7        | 1.7        | 0.0         | NA                   | NA          | NA                   | NA          | NA                    | NA          |

**Table S3, related to Figure 4. Expression of non-microglial myeloid cell-enriched gene cassette from Bennett et al 2016 in ICT-MGs, HSC- and YS-MLCs.** Columns (left to right) show gene name, FPKM values, Log<sub>2</sub>(fold change values) for 3 relevant comparisons, and associated p-values. Colored genes indicate DGE between YS- and HSC-MLCs (2 fold cutoff, FDR<0.05, FPKM >20). Genes colored blue were closer to MG levels in YS-MLCs, while genes colored orange were closer in HSC-MLCs. NA = unable to achieve meaningful statistical comparison based on read counts by edgeR.

Table 4: Genes decreased in IP BM MLCs (2-3 months brain residence) compared to ICT BM MLCs (2 weeks brain residence), related to Figure 4.

| Gene          | ICT BM | IP BM | Log2 (ICT/ IP) | FDR   |
|---------------|--------|-------|----------------|-------|
| 4833417C18Rik | 20.51  | 0.82  | 4.06           | 0.000 |
| Ddit4         | 31.18  | 1.81  | 4.02           | 0.000 |
| Amica1        | 34.95  | 2.35  | 3.99           | 0.000 |
| 2810008D09Rik | 45.15  | 5.44  | 3.19           | 0.000 |
| Hist1h1e      | 32.06  | 3.59  | 3.01           | 0.000 |
| Samd1         | 36.97  | 6.06  | 2.81           | 0.000 |
| Cbr2          | 20.64  | 4.84  | 2.76           | 0.010 |
| Adam19        | 69.85  | 10.3  | 2.76           | 0.000 |
| C030034L19Rik | 127.09 | 19    | 2.71           | 0.000 |
| U2af114       | 29.14  | 5.59  | 2.69           | 0.003 |
| Dok3          | 44.82  | 7.67  | 2.66           | 0.000 |
| Clec4a1       | 22.59  | 3.4   | 2.63           | 0.004 |
| Spp1          | 50.64  | 7.66  | 2.61           | 0.003 |
| Snhg3         | 60.39  | 15.4  | 2.52           | 0.001 |
| Ier2          | 209.03 | 37.5  | 2.50           | 0.000 |
| Arl10         | 41.57  | 7.63  | 2.48           | 0.004 |
| 2410004N09Rik | 35.35  | 5.05  | 2.46           | 0.024 |
| Ssna1         | 43.99  | 7.81  | 2.45           | 0.008 |
| Pnpla2        | 45.86  | 9.17  | 2.37           | 0.000 |
| Per1          | 119.81 | 24.9  | 2.36           | 0.000 |
| Fkbp5         | 197.23 | 30.1  | 2.34           | 0.001 |
| Rps16         | 40.51  | 49.7  | 2.34           | 0.038 |
| Stab1         | 156.37 | 33.1  | 2.31           | 0.000 |
| Rps27a        | 34.36  | 11.9  | 2.31           | 0.015 |
| Serpinf1      | 125.35 | 26.4  | 2.30           | 0.000 |
| Dctpp1        | 59.52  | 9.98  | 2.30           | 0.028 |
| Htra2         | 33.98  | 26.5  | 2.29           | 0.006 |
| Klf2          | 146.66 | 30.7  | 2.29           | 0.001 |
| Mpdu1         | 20.08  | 6.72  | 2.28           | 0.022 |
| C1qa          | 1187.1 | 253   | 2.25           | 0.000 |
| Ppia          | 134.48 | 142   | 2.22           | 0.012 |
| Lsp1          | 83.81  | 18    | 2.17           | 0.001 |
| Zfp414        | 31.63  | 6.01  | 2.17           | 0.002 |
| Slc38a7       | 22.27  | 4.27  | 2.14           | 0.002 |
| Fau           | 70.92  | 56    | 2.13           | 0.050 |
| Rps29         | 285.31 | 218   | 2.13           | 0.017 |
| Sult1a1       | 184.48 | 37    | 2.13           | 0.003 |
| Sh3gl1        | 26.03  | 9.41  | 2.09           | 0.006 |
| Fcgrt         | 25.74  | 6.22  | 2.07           | 0.016 |
| Exosc5        | 20.24  | 4.59  | 2.06           | 0.031 |
| Arrdc1        | 62     | 16.1  | 2.05           | 0.000 |
| Dhrs4         | 22.91  | 5.82  | 2.05           | 0.029 |
| Mitd1         | 22.78  | 5.21  | 2.02           | 0.049 |
| Prkab1        | 65.28  | 19.2  | 2.00           | 0.006 |
| Neat1         | 225.88 | 56.9  | 1.98           | 0.008 |
| Ugt1a7c       | 21.19  | 7.43  | 1.97           | 0.040 |
| Zfp513        | 23.22  | 5.76  | 1.97           | 0.003 |
| Sf3b4         | 22.66  | 7.8   | 1.97           | 0.012 |
| Asna1         | 32.25  | 6.18  | 1.92           | 0.014 |

  

| Gene          | ICT BM | IP BM | Log2 (ICT/ IP) | FDR   |
|---------------|--------|-------|----------------|-------|
| Cryba4        | 49.54  | 10.16 | 1.92           | 0.011 |
| Dnase2a       | 20.29  | 8.91  | 1.91           | 0.012 |
| Snrpa         | 32.89  | 10.62 | 1.89           | 0.015 |
| Slfn2         | 38.11  | 11.01 | 1.88           | 0.006 |
| Bcl2l1        | 25.87  | 7.15  | 1.87           | 0.029 |
| Irf3          | 53.89  | 15.83 | 1.83           | 0.003 |
| Slc2a3        | 22.72  | 6.67  | 1.79           | 0.047 |
| Lyl1          | 181.1  | 53.34 | 1.77           | 0.000 |
| Ppp4c         | 45.09  | 12.73 | 1.77           | 0.029 |
| Miip          | 21.75  | 8.19  | 1.74           | 0.028 |
| H2-DMa        | 240.8  | 82.49 | 1.74           | 0.012 |
| H2-DMb2       | 77.88  | 22    | 1.69           | 0.049 |
| Polg          | 24.02  | 7.23  | 1.69           | 0.015 |
| Atp13a1       | 23.52  | 9.19  | 1.69           | 0.006 |
| Ap1b1         | 44.13  | 13.47 | 1.67           | 0.004 |
| Shmt2         | 20.51  | 6.66  | 1.66           | 0.027 |
| Glt25d1       | 65.77  | 20.3  | 1.64           | 0.002 |
| Ltc4s         | 117.7  | 37.2  | 1.64           | 0.044 |
| Anapc16       | 74.34  | 21.78 | 1.63           | 0.012 |
| Isyna1        | 40.01  | 13.86 | 1.63           | 0.017 |
| Araf          | 44.17  | 18.17 | 1.63           | 0.011 |
| Sdc4          | 50.53  | 15.66 | 1.61           | 0.034 |
| Rogdi         | 142.9  | 52.51 | 1.60           | 0.012 |
| 1810031K17Rik | 52.81  | 17.67 | 1.56           | 0.047 |
| Slc35c2       | 56.31  | 20.12 | 1.56           | 0.036 |
| Ptms          | 139.7  | 50.17 | 1.56           | 0.030 |
| Rnf169        | 71.47  | 23.1  | 1.54           | 0.002 |
| Traf3ip3      | 30.69  | 10.03 | 1.52           | 0.029 |
| Scamp5        | 52.12  | 17.72 | 1.52           | 0.026 |
| Naga          | 37.44  | 13.26 | 1.50           | 0.021 |
| Hlx           | 27.79  | 11.47 | 1.47           | 0.027 |
| Ggta1         | 80.25  | 29.43 | 1.45           | 0.027 |
| Gpr108        | 42.63  | 12.44 | 1.44           | 0.031 |
| B4galnt1      | 90.39  | 31.23 | 1.42           | 0.049 |
| Hist1h1c      | 41.66  | 12.64 | 1.41           | 0.035 |
| Tsc22d3       | 252.6  | 96.9  | 1.40           | 0.039 |
| Ak2           | 134.5  | 51.24 | 1.38           | 0.028 |
| Tspyl2        | 39.75  | 14.85 | 1.38           | 0.037 |
| Zfp36l1       | 627.7  | 248.9 | 1.35           | 0.016 |
| P2ry6         | 222.2  | 88.71 | 1.35           | 0.033 |
| Tmem104       | 82.77  | 29.97 | 1.34           | 0.017 |
| Fbbs          | 69.97  | 30.96 | 1.32           | 0.030 |
| Cd14          | 550.6  | 226.4 | 1.32           | 0.029 |
| Kcnk6         | 94.49  | 37.25 | 1.30           | 0.022 |
| Atp6v0b       | 283.4  | 126.7 | 1.29           | 0.048 |
| Hk3           | 24.55  | 10.92 | 1.28           | 0.049 |
| Kdm6b         | 41.14  | 18.33 | 1.28           | 0.033 |
| Ppcdc         | 121.4  | 56.03 | 1.23           | 0.046 |
| Slc43a2       | 71.13  | 29.77 | 1.21           | 0.031 |

**Table S4, related to Figure 4. Genes more highly expressed in MLCs from BM ICT at 2 weeks than MLCs from BM IP at 2-3 months.** Columns (left to right) show gene name, FPKM values, Log<sub>2</sub>(fold change), and associated FDRs, for all genes with FPKM>20 in at least 1 sample, and Log<sub>2</sub>(FC) of 1 or higher.

Table S5: Genes increased in IP BM MLCs (2-3 months brain residence) compared to ICT BM MLCs (2 weeks brain residence), related to Figure 4.

| Gene          | ICT BM | IP BM  | Log2 (ICT/IP) | FDR   |
|---------------|--------|--------|---------------|-------|
| Eif2s3y       | 0.59   | 35.8   | -6.47         | 0.000 |
| Ddx3y         | 0.31   | 21.53  | -6.17         | 0.000 |
| Lyz1          | 10.17  | 31.49  | -5.93         | 0.010 |
| St8sia6       | 0.99   | 30.67  | -5.30         | 0.000 |
| Atp1b1        | 1.54   | 50.09  | -5.01         | 0.015 |
| Rps23         | 85.35  | 112.7  | -4.55         | 0.000 |
| Cdr1          | 2.75   | 53.75  | -4.16         | 0.041 |
| Ndrp2         | 1.28   | 20.2   | -3.67         | 0.037 |
| 1810011O10Rik | 1.01   | 29.9   | -3.51         | 0.000 |
| G530011O06Rik | 3.19   | 29.62  | -3.46         | 0.000 |
| Qpct          | 4.34   | 34.97  | -3.19         | 0.012 |
| Kcnj13        | 4.67   | 32.77  | -2.79         | 0.004 |
| Tgm2          | 4.26   | 38.35  | -2.76         | 0.002 |
| Galnt3        | 5.4    | 27.46  | -2.66         | 0.000 |
| Siglech       | 45.59  | 229.05 | -2.34         | 0.000 |
| Cab39l        | 5.19   | 23.24  | -2.33         | 0.023 |
| Ccnd2         | 8.37   | 37.82  | -2.22         | 0.003 |
| Inpp4b        | 6.57   | 26.8   | -2.21         | 0.035 |
| Hmgb2         | 10.17  | 31.12  | -2.18         | 0.008 |
| A1504432      | 8.96   | 43.19  | -2.18         | 0.012 |
| H2-M3         | 11.55  | 44.83  | -2.12         | 0.009 |
| Cmpk1         | 14.61  | 61.48  | -2.12         | 0.000 |
| Tmed5         | 16.64  | 60.49  | -2.06         | 0.012 |
| Rab6b         | 5.58   | 22.57  | -2.05         | 0.016 |
| Camk2n1       | 9.41   | 38.75  | -1.96         | 0.004 |
| Myo1b         | 7.92   | 30.06  | -1.90         | 0.009 |
| Peli1         | 15.53  | 54.4   | -1.85         | 0.012 |
| Abcc9         | 8.87   | 31.52  | -1.85         | 0.006 |
| Niacr1        | 6.96   | 26.93  | -1.83         | 0.037 |
| Rtn1          | 24.9   | 91.44  | -1.79         | 0.030 |
| Pkib          | 8.66   | 29.93  | -1.78         | 0.027 |
| Klra2         | 110.98 | 355.86 | -1.77         | 0.003 |
| Arhgap5       | 22.81  | 69.58  | -1.70         | 0.027 |
| Ids           | 23.7   | 74.67  | -1.67         | 0.031 |
| B3gnt2        | 22.14  | 67.73  | -1.67         | 0.024 |
| Cfh           | 70.15  | 176.16 | -1.67         | 0.020 |
| Plxna4        | 10.95  | 31.68  | -1.67         | 0.012 |
| Tex2          | 9.25   | 29.49  | -1.61         | 0.022 |
| Fam98b        | 11.54  | 34.38  | -1.61         | 0.026 |
| Basp1         | 29.04  | 78.35  | -1.60         | 0.027 |
| Htra3         | 7.22   | 21.16  | -1.58         | 0.050 |
| Dnajc28       | 9.05   | 25.28  | -1.56         | 0.049 |
| Leprel1       | 8.84   | 23.64  | -1.56         | 0.048 |
| Ifi204        | 14.1   | 30.23  | -1.52         | 0.048 |
| Tlr3          | 13.16  | 34.91  | -1.50         | 0.037 |
| H2-K1         | 320.31 | 874.72 | -1.49         | 0.024 |
| Ier5          | 107.84 | 295.01 | -1.48         | 0.038 |
| Arhgap15      | 50.11  | 122.93 | -1.45         | 0.031 |
| Lrrc3         | 87.08  | 222.08 | -1.39         | 0.029 |
| Sgpp1         | 33.38  | 82.43  | -1.38         | 0.030 |



**Table S5, related to Figure 4. Genes more highly expressed in MLCs from BM IP at 2-3 months than MLCs from BM ICT at 2 weeks.** Columns (left to right) show gene name, FPKM values, Log<sub>2</sub>(fold change), and associated FDRs, for all genes with FPKM>20 in at least 1 sample, and Log<sub>2</sub>(FC) of -1 or lower.
